# Supplementary material
Source: PubMed Central journal article supplement (PMC2859087)

**SUPPORTING INFORMATION**  
**FIGURE CAPTIONS**

SI Figure 1:

Identification of yeast frataxin residues affected by the presence of 0.0025% deoxycholate. Small perturbations in backbone  $^1\text{H}$  and  $^{15}\text{N}$  resonances were induced by the addition of deoxycholate to  $^{15}\text{N}$  labeled apo-frataxin. Normalized chemical shift changes are plotted vs. amino acid sequence number. *Top*: Frataxin secondary structure information.

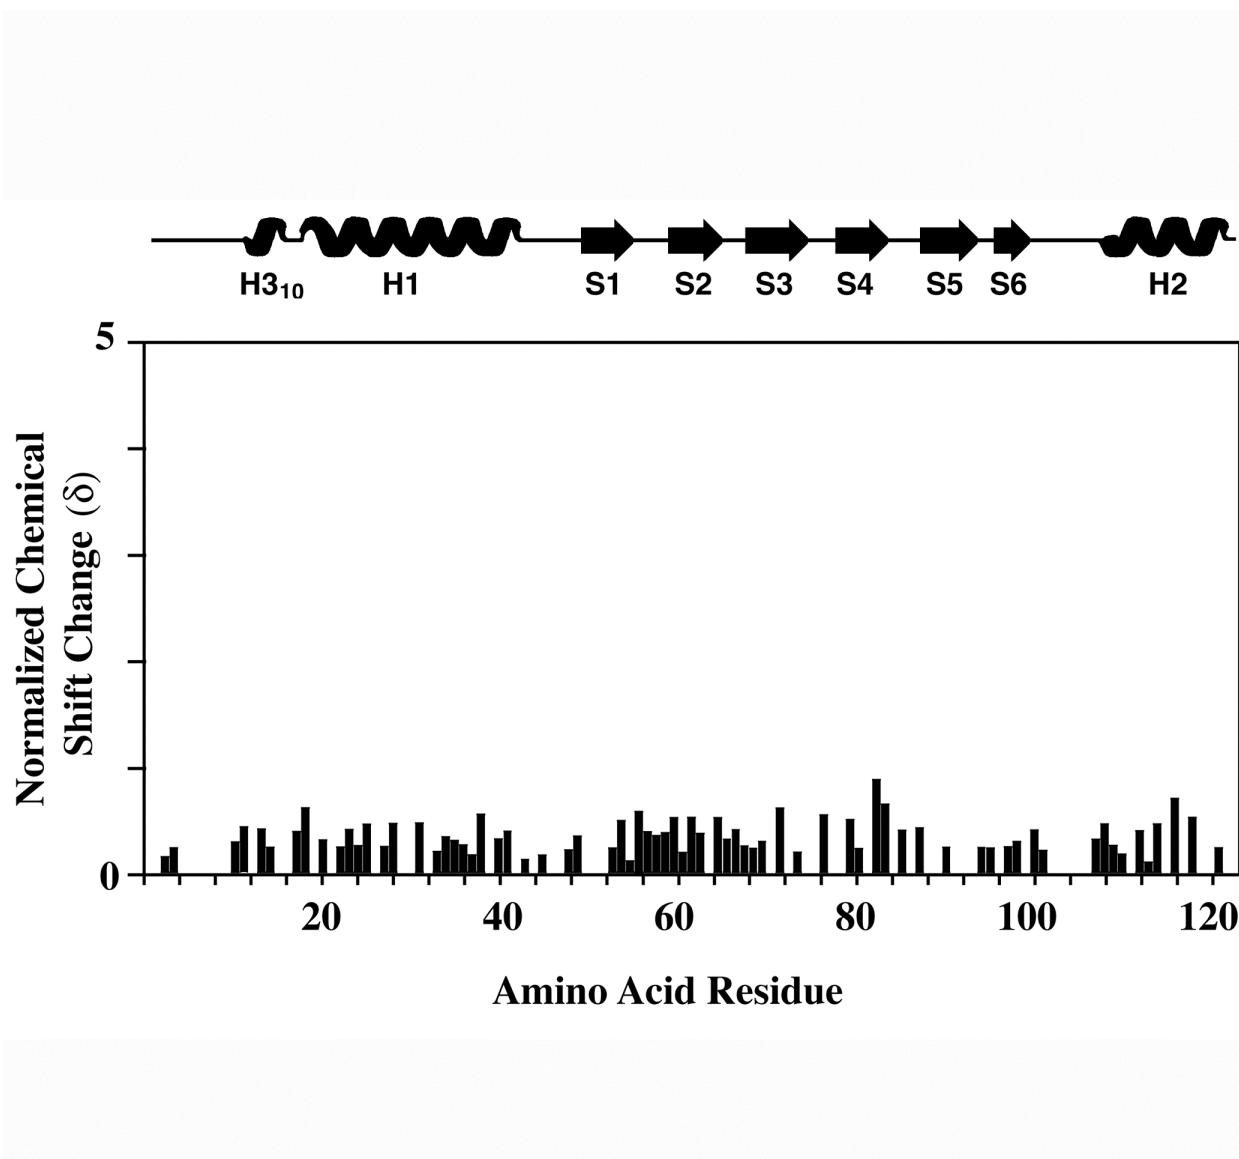

Supplement: NIHMS99998-supplement-Supp_Data.pdf [file NIHMS99998-supplement-Supp_Data.pdf]
